# Supplementary material
Source: Research Square preprint supplement (doi:10.21203/rs.3.rs-9997166/v1)
Supplement: Supplementary file 1 [file 94ff94f1dfcd08dcde53d8af.docx]

**Supplementary information**

**Figure 1a Total TNPO3**  **β-Actin**


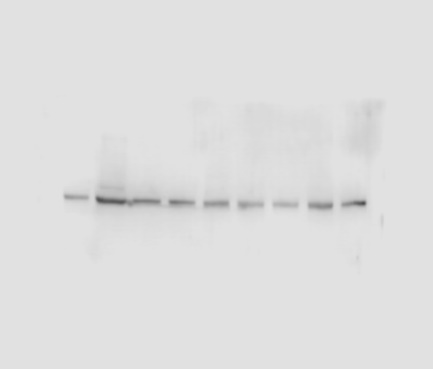


CNT

LGMDD2

Gapmer1

CNT

LGMDD2

Gapmer1

CNT

LGMDD2

Gapmer1

- 42


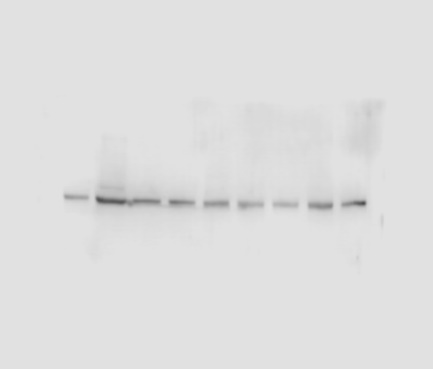

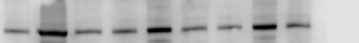


CNT

LGMDD2

Gapmer1

CNT

LGMDD2

Gapmer1

CNT

LGMDD2

Gapmer1

- 100

Gapmer1


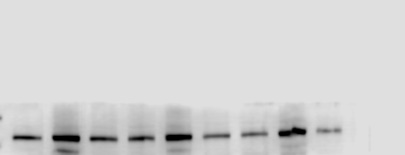

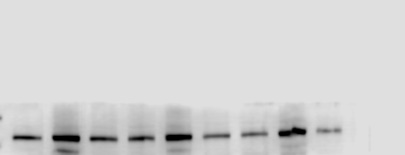


CNT

LGMDD2

Gapmer2

CNT

LGMDD2

Gapmer2

CNT

LGMDD2

Gapmer2

- 100


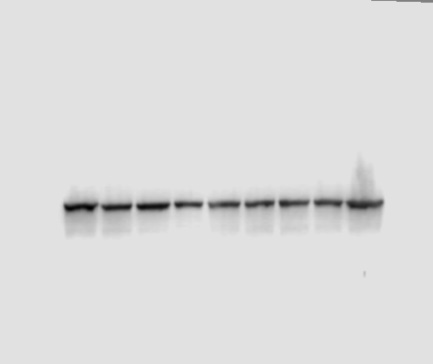


CNT

LGMDD2

Gapmer2

CNT

LGMDD2

Gapmer2

CNT

LGMDD2

Gapmer2

- 42

Gapmer2


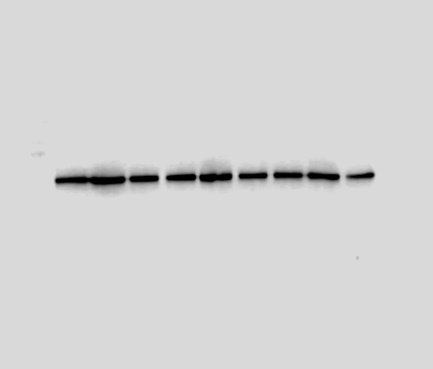


CNT

LGMDD2

Gapmer3

CNT

LGMDD2

Gapmer3

CNT

LGMDD2

Gapmer3

- 42


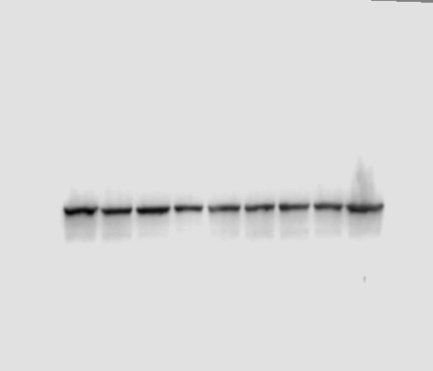

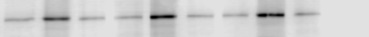


CNT

LGMDD2

Gapmer3

CNT

LGMDD2

Gapmer3

CNT

LGMDD2

Gapmer3

- 100

Gapmer3


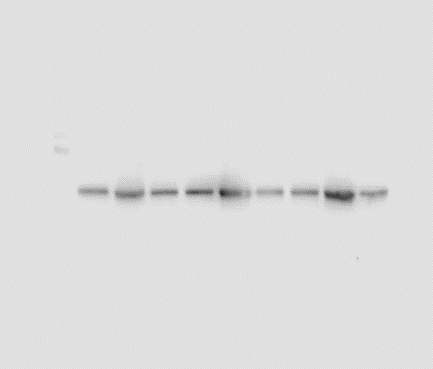


CNT

LGMDD2

Gapmer4

CNT

LGMDD2

Gapmer4

CNT

LGMDD2

Gapmer4

- 42


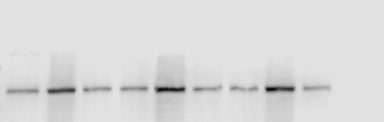

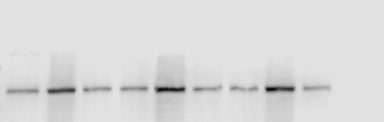


CNT

LGMDD2

Gapmer4

CNT

LGMDD2

Gapmer4

CNT

LGMDD2

Gapmer4

- 100

Gapmer4

**Figure 1b TNPO3 mut**  **β-Actin**


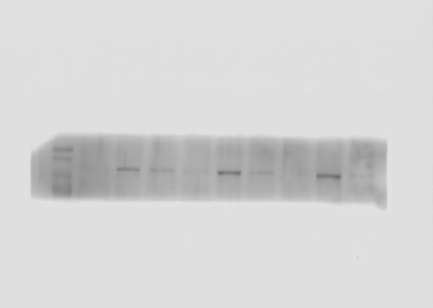

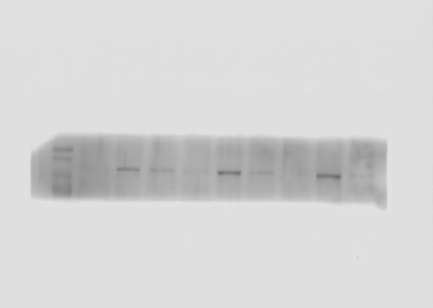


CNT

LGMDD2

Gapmer1

CNT

LGMDD2

Gapmer1

CNT

LGMDD2

Gapmer1

- 100


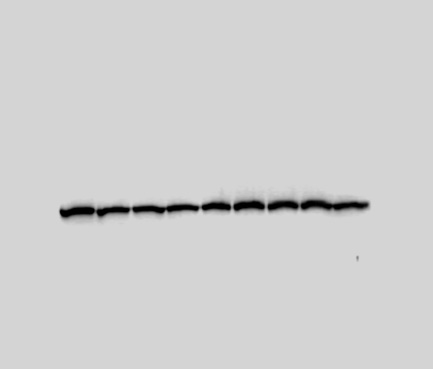


CNT

LGMDD2

Gapmer1

CNT

LGMDD2

Gapmer1

CNT

LGMDD2

Gapmer1

- 42

Gapmer1


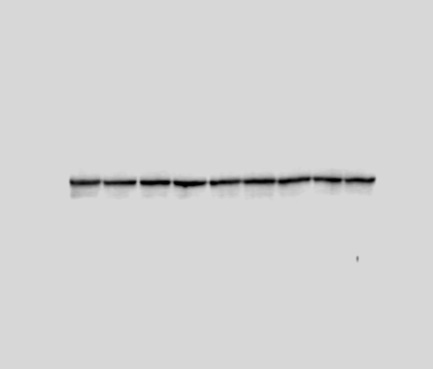


CNT

LGMDD2

Gapmer2

CNT

LGMDD2

Gapmer2

CNT

LGMDD2

Gapmer2


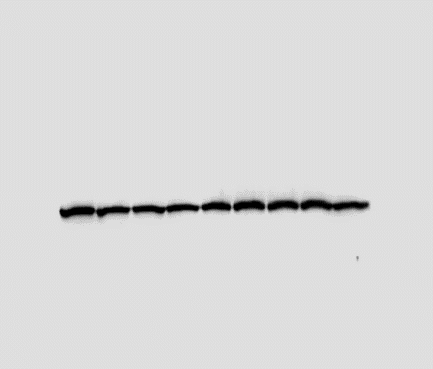

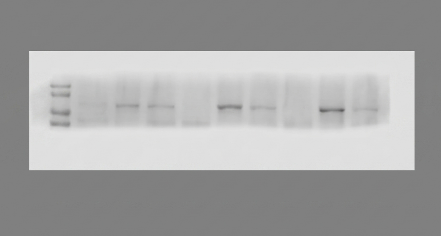


CNT

LGMDD2

Gapmer2

CNT

LGMDD2

Gapmer2

CNT

LGMDD2

Gapmer2

Gapmer2

- 42

- 100


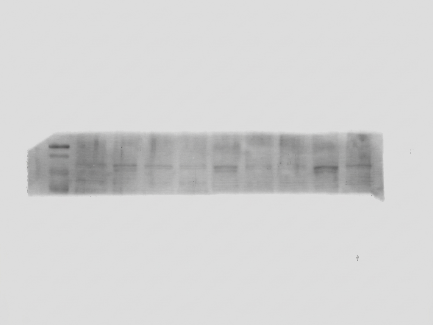

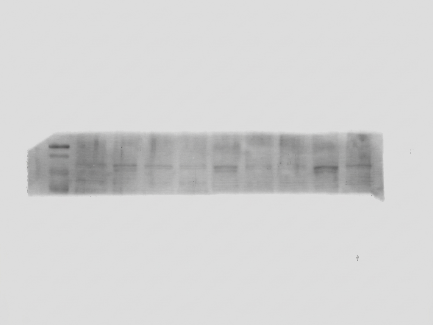


CNT

LGMDD2

Gapmer3

CNT

LGMDD2

Gapmer3

CNT

LGMDD2

Gapmer3

- 100


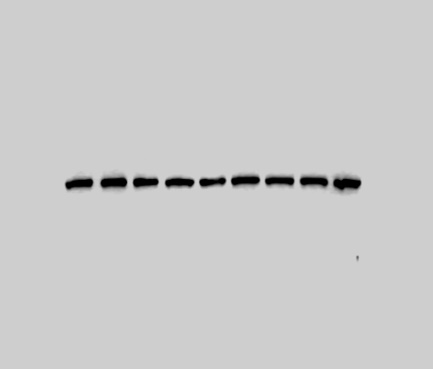


CNT

LGMDD2

Gapmer3

CNT

LGMDD2

Gapmer3

CNT

LGMDD2

Gapmer3

Gapmer3

- 42


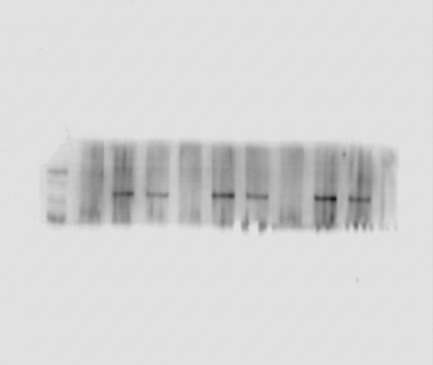

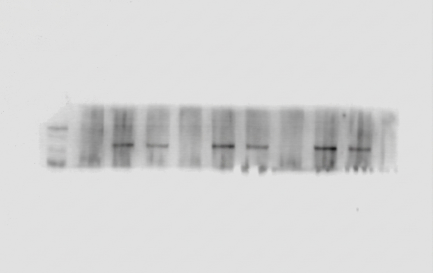


CNT

LGMDD2

Gapmer4

CNT

LGMDD2

Gapmer4

CNT

LGMDD2

Gapmer4

- 100


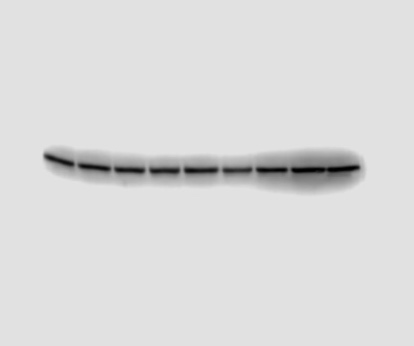


CNT

LGMDD2

Gapmer4

CNT

LGMDD2

Gapmer4

CNT

LGMDD2

Gapmer4

Gapmer4

- 42

**Figure 1c P62 β-Actin**


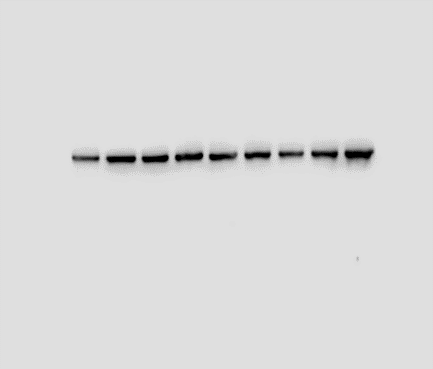


CNT

LGMDD2

Gapmer1

CNT

LGMDD2

Gapmer1

CNT

LGMDD2

Gapmer1


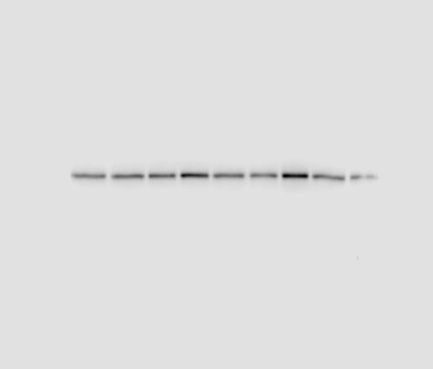


CNT

LGMDD2

Gapmer1

CNT

LGMDD2

Gapmer1

CNT

LGMDD2

Gapmer1

- 62

- 42

Gapmer1


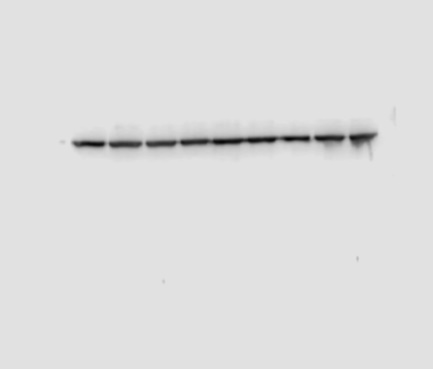


CNT

LGMDD2

Gapmer2

CNT

LGMDD2

Gapmer2

CNT

LGMDD2

Gapmer2

- 42


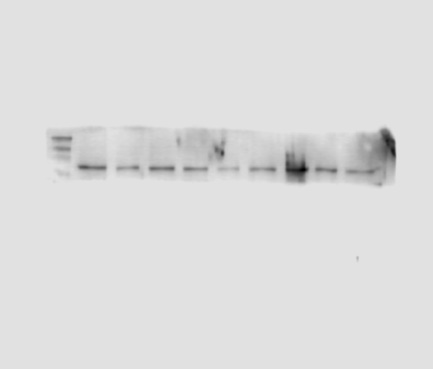


CNT

LGMDD2

Gapmer2

CNT

LGMDD2

Gapmer2

CNT

LGMDD2

Gapmer2

- 62

Gapmer2


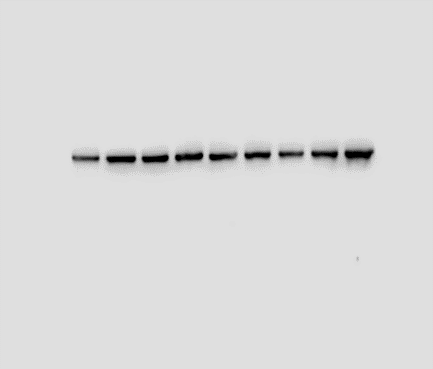


CNT

LGMDD2

Gapmer3

CNT

LGMDD2

Gapmer3

CNT

LGMDD2

Gapmer3

- 42


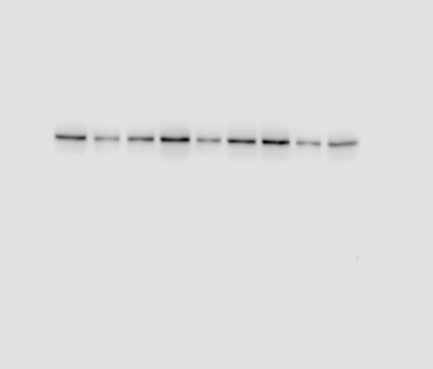


CNT

LGMDD2

Gapmer3

CNT

LGMDD2

Gapmer3

CNT

LGMDD2

Gapmer3

- 62

Gapmer3


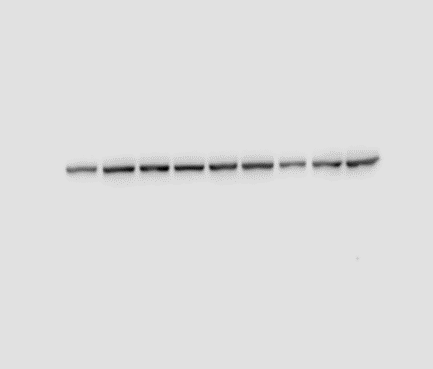


CNT

LGMDD2

Gapmer4

CNT

LGMDD2

Gapmer4

CNT

LGMDD2

Gapmer4

- 42


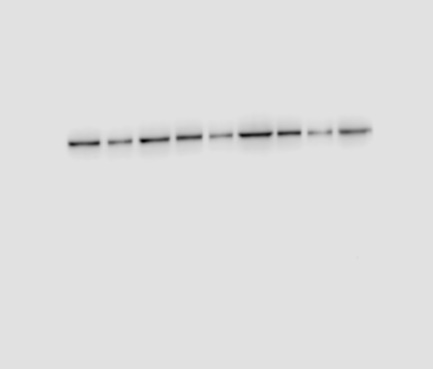


CNT

LGMDD2

Gapmer4

CNT

LGMDD2

Gapmer4

CNT

LGMDD2

Gapmer4

- 62

Gapmer4

**Figure 1d LC3 I/II β-Actin**


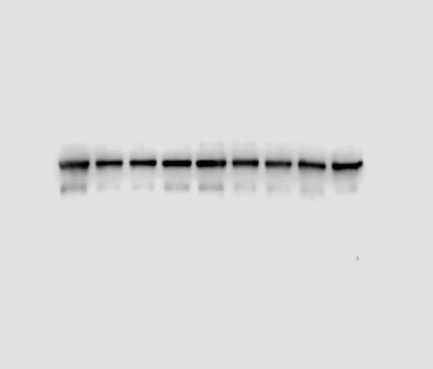


CNT

LGMDD2

Gapmer1

CNT

LGMDD2

Gapmer1

CNT

LGMDD2

Gapmer1


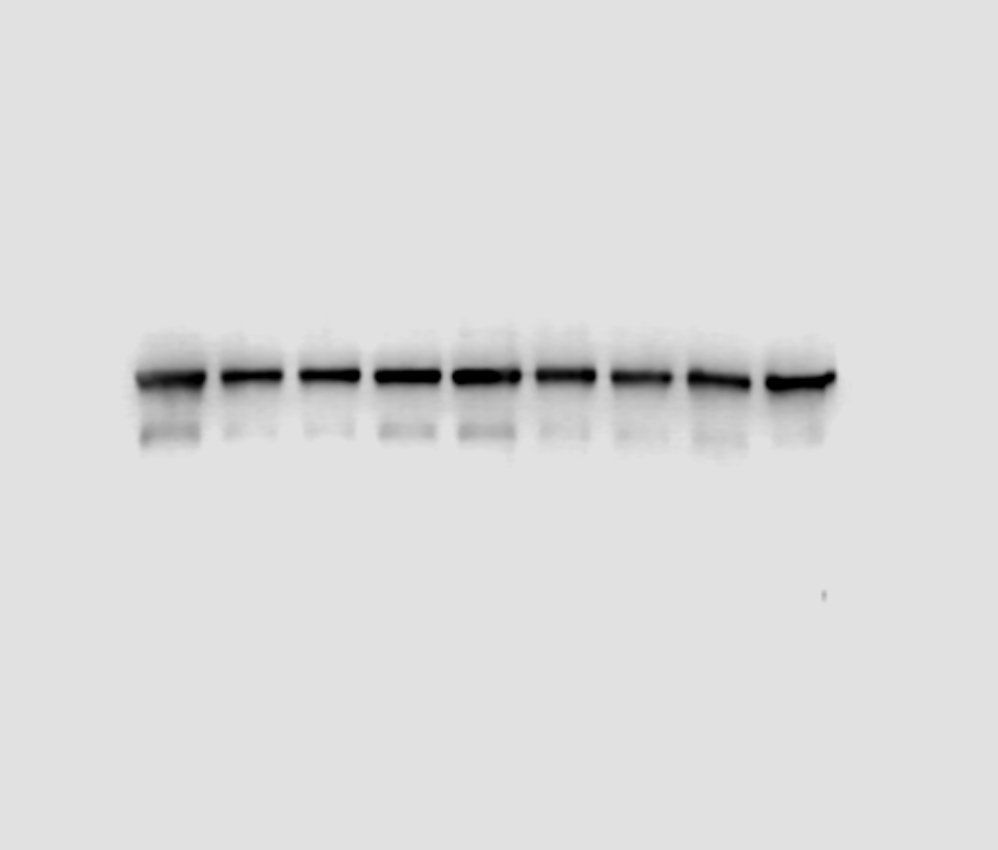

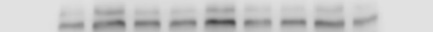


CNT

LGMDD2

Gapmer1

CNT

LGMDD2

Gapmer1

CNT

LGMDD2

Gapmer1

-18

-16

LC3 I -

LC3 II-

Gapmer1

- 42


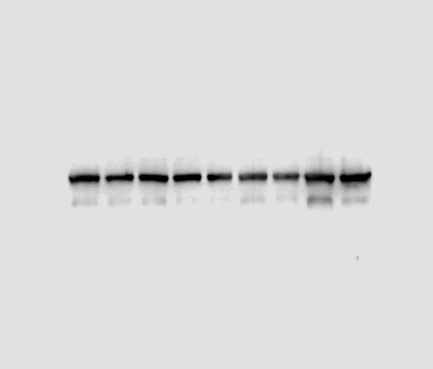


CNT

LGMDD2

Gapmer2

CNT

LGMDD2

Gapmer2

CNT

LGMDD2

Gapmer2

- 42


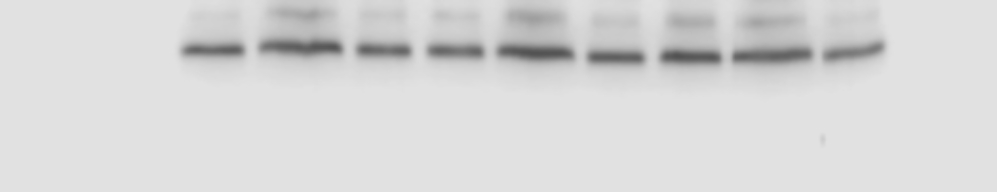

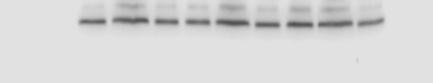


CNT

LGMDD2

Gapmer2

CNT

LGMDD2

Gapmer2

CNT

LGMDD2

Gapmer2

-18

-16

LC3 I -

LC3 II-

Gapmer2


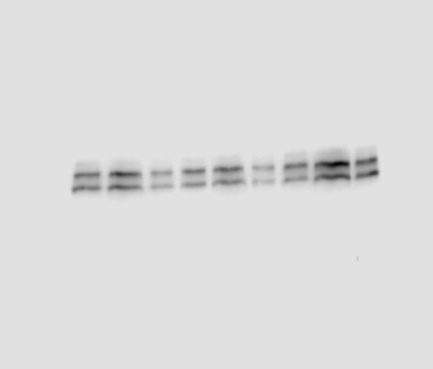


CNT

LGMDD2

Gapmer3

CNT

LGMDD2

Gapmer3

CNT

LGMDD2

Gapmer3

-18

-16

LC3 I -

LC3 II-


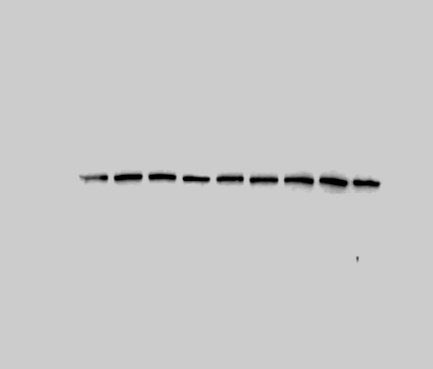


CNT

LGMDD2

Gapmer3

CNT

LGMDD2

Gapmer3

CNT

LGMDD2

Gapmer3

- 42

Gapmer3


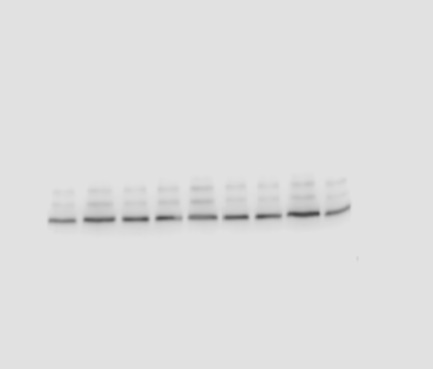


CNT

LGMDD2

Gapmer4

CNT

LGMDD2

Gapmer4

CNT

LGMDD2

Gapmer4

-18

-16

LC3 I -

LC3 II-


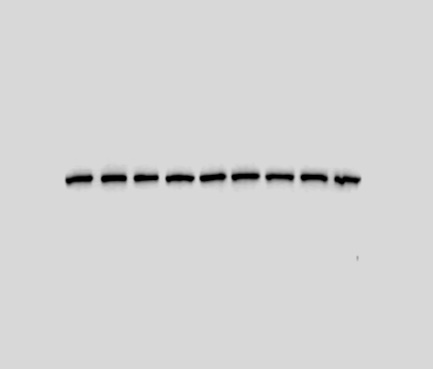


CNT

LGMDD2

Gapmer4

CNT

LGMDD2

Gapmer4

CNT

LGMDD2

Gapmer4

- 42

Gapmer4

**Supplementary Fig.1** **Expression of autophagy-associated proteins and TNPO3 assessed by Western blot in CNT and LGMDD2 cells treated with Gapmers.**

The figure shows representative results obtained by Western blot from three independent experimental replicates performed on CNT cells, LGMDD2 cells, and LGMDD2 cells treated with Gapmers. (a) Detection of total TNPO3 protein, showing bands of approximately 100 kDa. (b) Detection of mutant TNPO3 protein, showing bands of approximately 100 kDa. (c) Detection of p62 protein, showing bands of approximately 62 kDa. (d) Detection of LC3-I and LC3-II, showing bands of approximately 18 kDa and 16 kDa, respectively. β-actin was used as an endogenous loading control on all membranes, with bands of approximately 42 kDa observed in all assays. Densitometric analysis of the bands was performed using GelAnalyzer 23.1.1 software.
